# Supplementary material
Source: publisher site journal article supplement (https://www.dovepress.com/article/313188)
Supplement: Supplementary file 1 [file get_supplementary_file.php]

**Supplementary materials**

Supplementary Table 1. Clinical observations of three COVID-19 patients in initial and second episodes.

| Subject | Age | Sex | Clinical Symptoms in initial episode | Medication | Clinical Symptoms in Second  episode | Medication | RT-  qPCR results in Second episode |
| --- | --- | --- | --- | --- | --- | --- | --- |
| S01 | 60 | M | Mild fibrosis formation around the site of inoculation of SARSCoV2 rtPCR positive serum. | Vitamin-C and Zinc tablet | High grade fever, nausea, ageusia, anosmia, confusion/hallucination, asthenia, fluctuation of blood pressure, insomnia. | Vitamin-C and Zinc tablet, Paracetamol, Oral saline | Positive |
| S02 | 37 | M | Fever, general asthenia, shortness of breath, dry cough. | Ivermectin, doxycycline, Vitamin-C and Zinc tablet | High grade fever, sore throat, dry cough, nausea, ageusia, anosmia, confusion, asthenia, fluctuation of blood pressure, diarrhea, insomnia, urine infection. | Azithromycin, Vitamin-C and Zinc tablet, Paracetamol and Oral saline | Positive |
| S03 | 24 | M | Low grade fever, diarrhea, general asthenia, sore throat, shortness of breath, dry cough. | Ivermectin, doxycycline, Vitamin-C Paracetamol and Zinc tablet | High grade fever, mild cough, nausea, ageusia, anosmia, diarrhea, fluctuation of blood pressure. | Ivermectin, doxycycline, Vitamin-C + Zinc, Paracetamol, Oral saline | Positive |

Supplementary Table-2: Sensitivity and specificity of NCP specific IgG, IgA and IgM in-house ELISA.

| **NCP** | Number (Sensitivity) | Number (Specificity) | AUC (95% CI) |
| --- | --- | --- | --- |
| **IgG** | Positive (n=81) | Negative (n=104) |  |
| Cut off 0.95 | 79(98.0%) | 94(90.4%) | 0.94(0.90, 0.98) |
| Cut off 1.00 | 77(94.9%) | 102(98.1%) | 0.97(0.93, 1.00) |
| **IgA** | Positive (n=30) | Negative (n=30) |  |
| Cut off 0.95 | 29(96.3%) | 28(93.3%) | 0.95(0.87, 1.00) |
| Cut off 1.00 | 28(93.3) | 30(100%) | 0.97(0.91, 1.00) |
| **IgM** | Positive (n=30) | Negative (n=30) |  |
| Cut off 0.95 | 29(96.3%) | 27(90%) | 0.93(0.86, 1.00) |
| Cut off 1.00 | 28(93.3%) | 30(100%) | 0.97(0.91, 1.00) |

Supplementary Table-3: Sensitivity and specificity of RBD specific IgG, IgA and IgM in-house ELISA.

| **RBD** | Number (Sensitivity) | Number (Specificity) | AUC (95% CI) |
| --- | --- | --- | --- |
| **IgG** | Positive (n=81) | Negative (n=104) |  |
| Cut off 0.95 | 78(97.5%) | 101(97.1%) | 0.97(0.94, 1.00) |
| Cut off 1.00 | 77(96.2%) | 104(100.0%) | 0.97(0.95, 1.00) |
| **IgA** | Positive (n=30) | Negative(n=30) |  |
| Cut off 0.95 | 28(93.3%) | 27(90.0%) | 0.92(0.84, 0.99) |
| Cut off 1.00 | 27(90.0%) | 30(100%) | 0.95(0.89, 1.00) |
| **IgM** | Positive (n=30) | Negative (n=30) |  |
| Cut off 0.95 | 27(90.0%) | 26(86.7%) | 0.88(0.79, 0.98) |
| Cut off 1.00 | 25(83.3%) | 29(96.7%) | 0.90(0.81, 0.99) |

Supplementary Table-4: Sensitivity and specificity of S1 specific IgG, IgA and IgM in-house ELISA.

| **S1** | Number (Sensitivity) | Number (Specificity) | AUC (95% CI) |
| --- | --- | --- | --- |
| **IgG** | Positive (n=81) | Negative (n=104) |  |
| Cut off 0.95 | 74(91.4%) | 94(90.4%) | 0.91(0.86, 0.96) |
| Cut off 1.00 | 76(94.9%) | 104(100%) | 0.97(0.94, 1.00) |
| **IgA** | Positive (n=34) | Negative (n=34) |  |
| Cut off 0.95 | 32(94.1%) | 29(85.3%) | 0.89(0.80, 0.98) |
| Cut off 1.00 | 30(88.2%) | 33(97.1%) | 0.93(0.85, 1.00) |
| **IgM** | Positive (n=34) | Negative (n=34) |  |
| Cut off 0.95 | 30(88.2%) | 30(88.2%) | 0.88(0.78, 0.97) |
| Cut off 1.00 | 28(82.4%) | 33(97.1%) | 0.90(0.81, 0.98) |

Supplementary Table-5: Sensitivity and specificity of S1+S2 specific IgG, IgA and IgM in-house ELISA.

| **S1+S2** | Number (Sensitivity) | Number (Specificity) | AUC (95% CI) |
| --- | --- | --- | --- |
| **IgG** | Positive (n=81) | Negative(n=104) |  |
| Cut off 0.95 | 80(98.8%) | 77(95.1%) | 0.96(0.93, 0.99) |
| Cut off 1.00 | 77(95.1%) | 104(100%) | 0.98(0.95, 1.00) |
| **IgA** | Positive (n=34) | Negative (n=34) |  |
| Cut off 0.95 | 31(91.2%) | 30(88.2%) | 0.89(0.80, 0.98) |
| Cut off 1.00 | 29(85.3%) | 33(97.1%) | 0.88(0.78, 0.97) |
| **IgM** | Positive (n=34) | Negative (n=34) |  |
| Cut off 0.95 | 30(88.2%) | 31(91.2%) | 0.89(0.80, 0.98) |
| Cut off 1.00 | 28(82.4%) | 33(97.1%) | 0.90(0.81, 0.98) |

Supplementary Figure-1: ROC curve of NCP IgG, IgA and IgM ELISA at various OD/cut-off


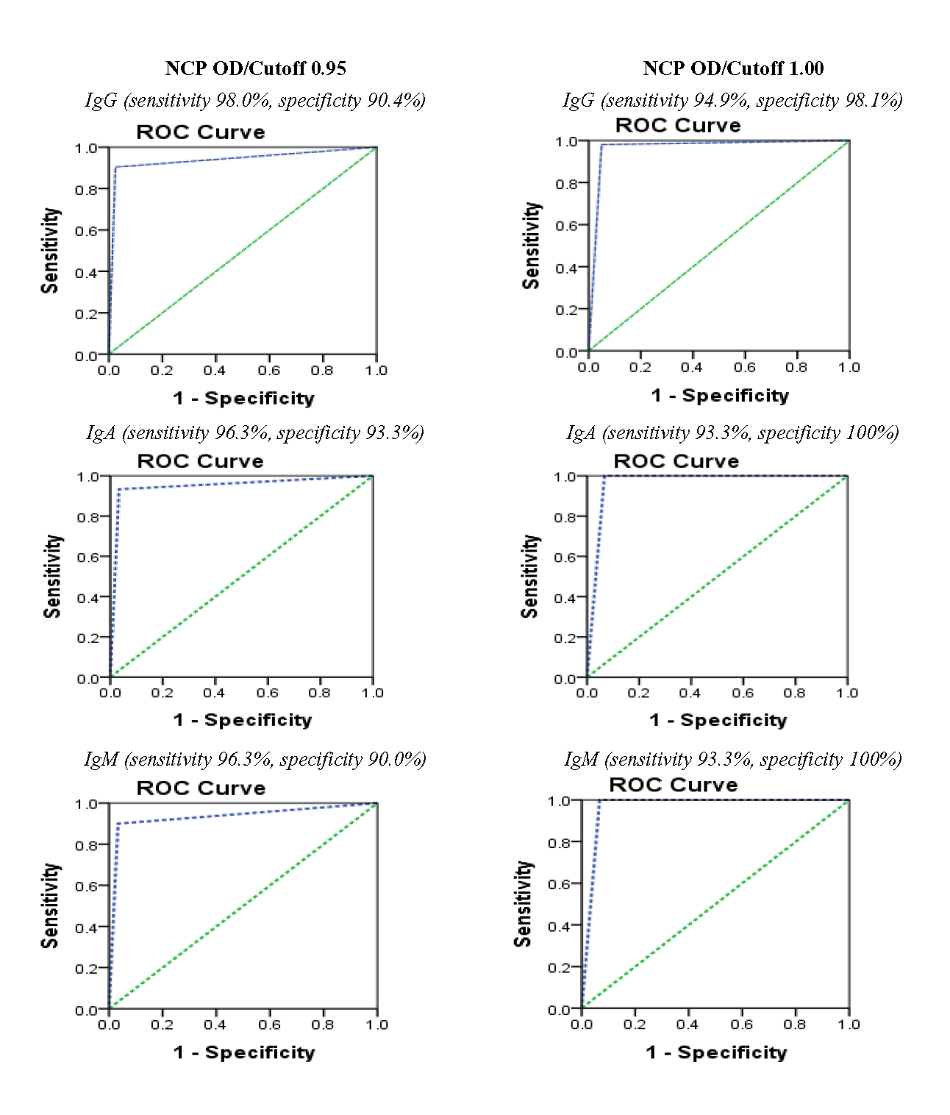


Supplementary Figure-2: ROC curve of RBD IgG, IgA and IgM ELISA at various OD/cut-off


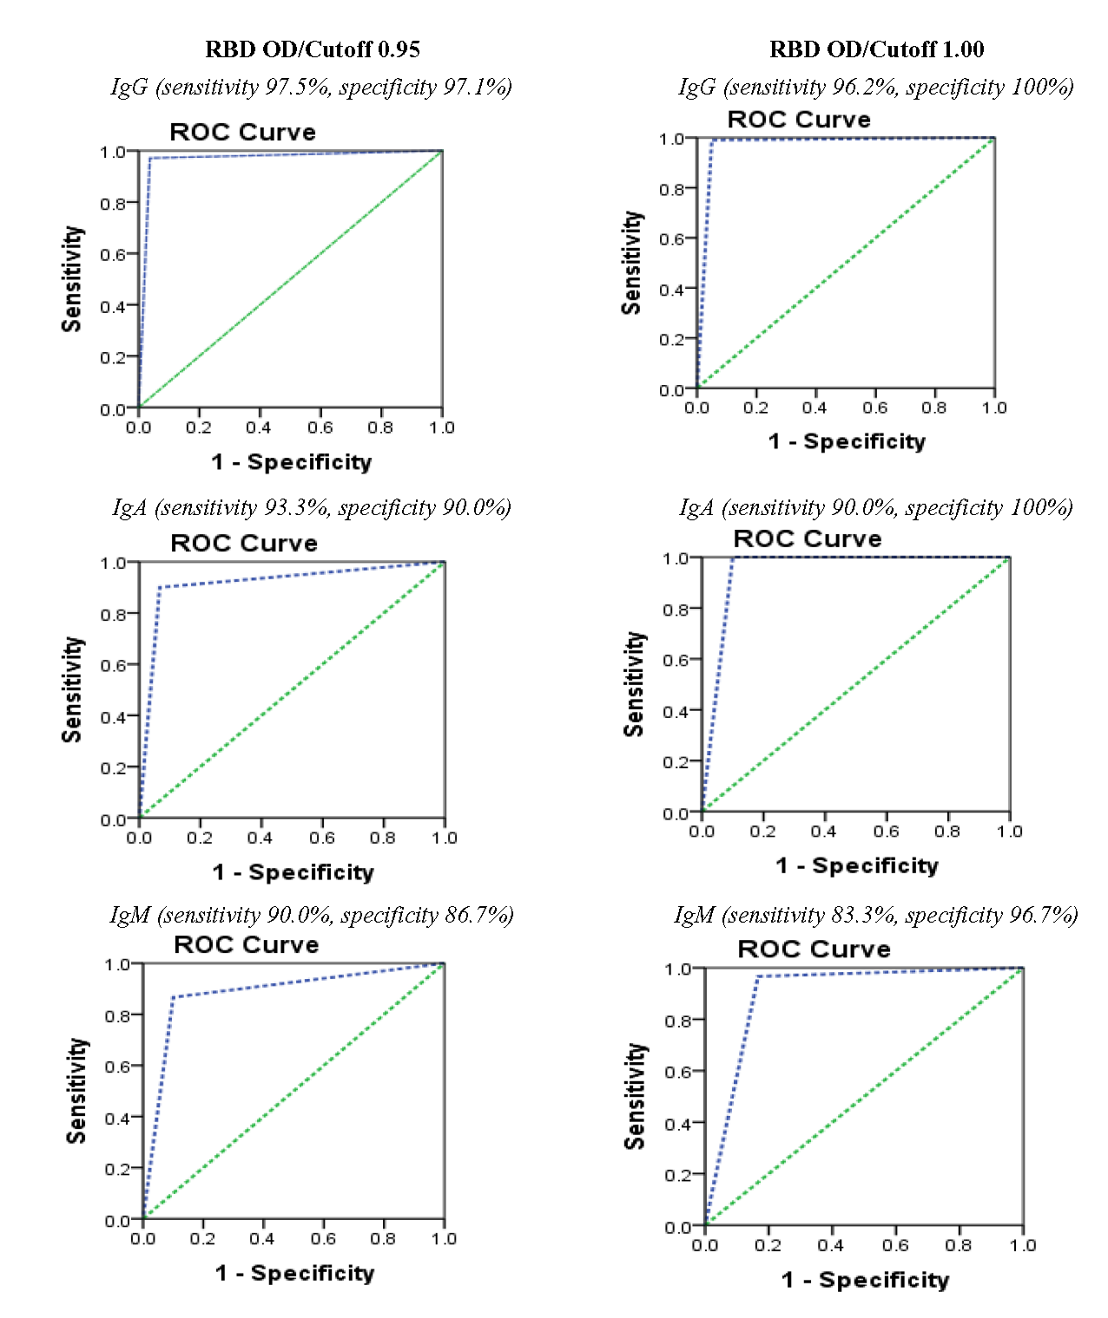


Supplementary Figure-3: ROC curve of S1 IgG, IgA and IgM ELISA at various OD/cut-off


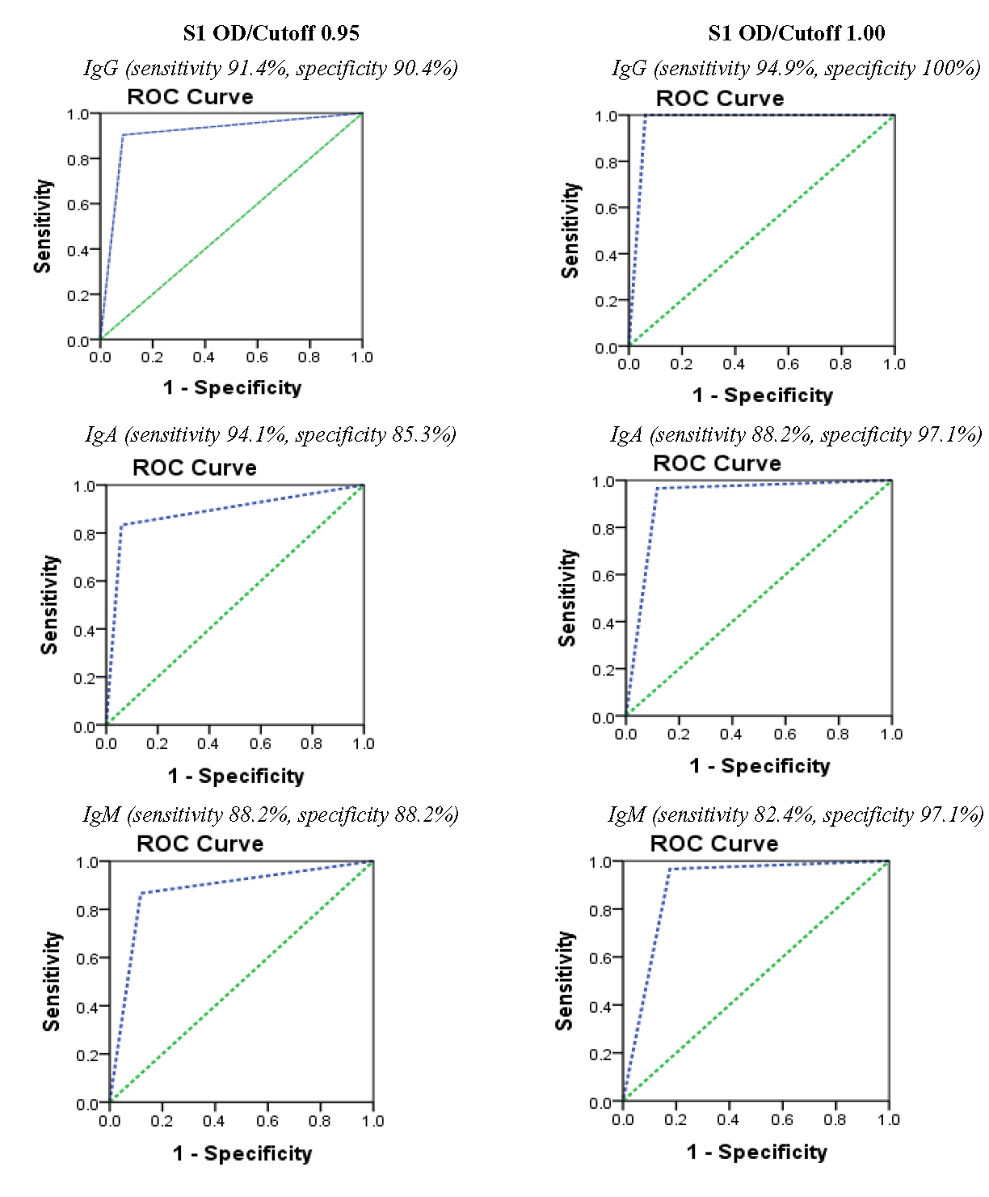


Supplementary Figure-4: ROC curve of S1+S2 IgG, IgA and IgM ELISA at various OD/cut-off


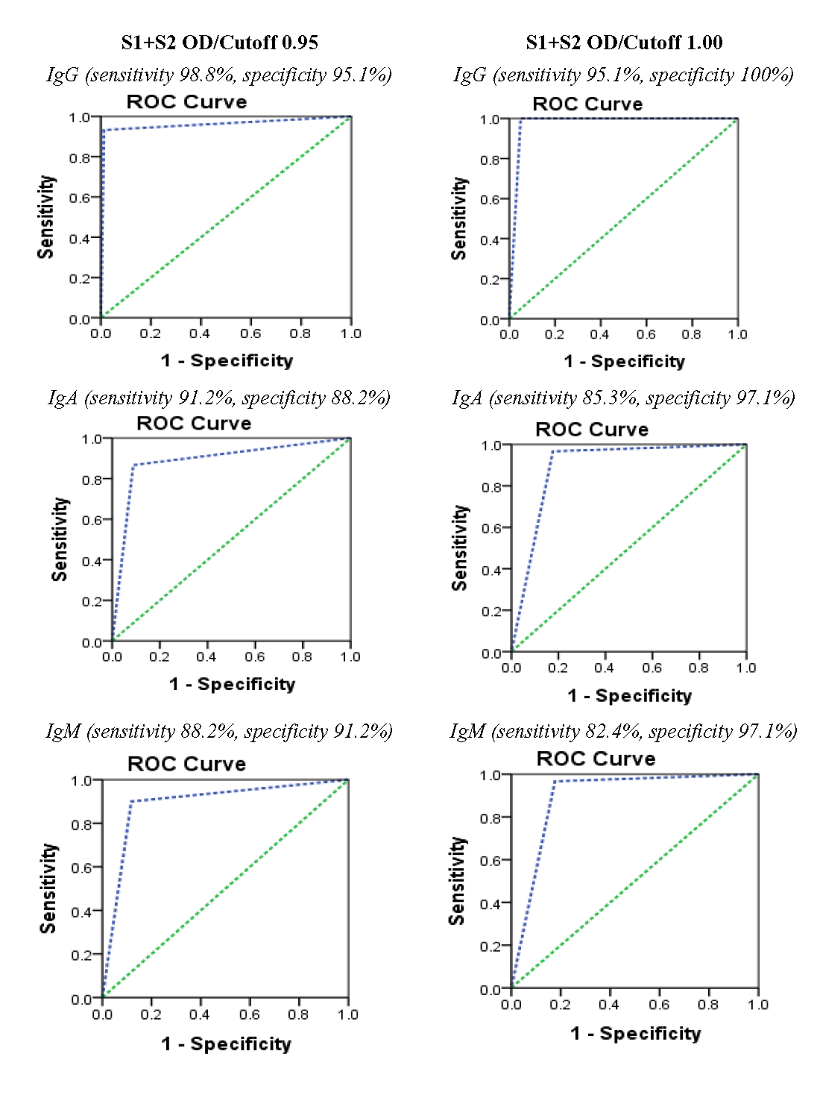


Supplementary Figure-5: IgG expression correlation stratified by each subject. All the antibody expression was compared with anti-RBD antibodies.





Supplementary Figure-6: IgM expression correlation stratified by each subject. All the antibody expression was compared with anti-RBD antibodies.





Supplementary Figure-7: IgA expression correlation stratified by each subject. All the antibody expression was compared with anti-RBD antibodies.
